# Supplementary material for: Reliability of Wearable Sensors Single and Dual-Task Timed Up and Go Test Among Community-Dwelling Older Women
Source: Research Square preprint supplement (doi:10.21203/rs.3.rs-6693525/v1), 2025-06-03
Supplement: Supplementary file 1 [file 40e06a8d479965d6bb6ae1c9.xlsx]

## Sheet: First test (DT-TUG)
First test of dual-task timed up and go test
Subject	Time to Complete Test	Walk Time	Mean Stance Time	Mean Step Time	Mean Stride Time	Mean Stride Length	Mean Stride Velocity	Number of Gait Cycles	Number of Steps	Cadence	Double Support of Gait Cycle	Coefficient of Variability Stride Time	Coefficient of Variability Step Time	Coefficient of Variability Stride Velocity	Coefficient of Variability Stride Length	Coefficient of Variability Single Support	Turn Mid-Point Time	Turn Time	Return from Turn Time	Turning Magnitude	Number Strides In Turn
1	10.2	6.73	0.72	0.64	1.34	71.54	51.12	3	12	86	40.07	3.8	4.38	5.05	3.4	4.55	2.54	2.64	2.33	88	3
2	10.82	7.3	0.74	0.7	1.42	72.87	52.06	4	14	85	41.04	4.03	4.65	5.65	3.43	4.8	2.67	2.8	2.42	90	3
3	11.55	7.8	0.76	0.72	1.37	73.5	52.19	4	14	82	42.87	3.95	4.67	5.14	3.6	4.8	2.7	2.87	2.58	90	3
4	12.14	8.45	0.77	0.74	1.48	75	50.37	5	15	80	46.37	4.5	4.27	5.1	3.2	5.16	2.7	3.07	2.6	85	3
5	10.84	7.21	0.74	0.7	1.4	72.36	51.5	4	13	83	42.82	3.88	4.4	5	3.43	4.7	2.63	2.65	2.4	92	3
6	12.2	8.4	0.77	0.75	1.58	75.26	50.15	5	14	81	46.31	4.48	4.93	5.29	4.32	4.65	2.83	3.09	2.61	87	3
7	11.35	7.45	0.75	0.7	1.4	73	50.8	4	13	82	43.5	4.35	4.52	5.2	4.53	4.89	2.66	2.7	2.45	87	3
8	11.42	7.66	0.75	0.73	1.42	73.2	50.78	4	14	83	44.8	4.2	4.14	5.3	3.3	3.94	2.6	2.71	2.55	88	3
9	10.68	7.26	0.74	0.67	1.38	72.23	51.78	4	13	83	42.85	3.85	4.43	4.57	3.47	5.72	2.84	3.6	2.44	85	3
10	12.09	8.3	0.77	0.74	1.48	74.55	49.9	5	14	80	46.6	4.22	4.84	6.4	3.8	5.12	2.75	3.24	2.59	84	4
11	12.42	8.51	0.77	0.75	1.53	75.58	49.8	5	15	80	46.28	4.7	5.3	5.5	4.77	5.79	2.82	2.82	2.63	88	3
12	11.15	7.71	0.74	0.69	1.38	72.6	50.94	4	13	84	44.5	4.01	4.56	5.1	3.6	4.81	2.35	2.76	2.4	92	3
13	10.45	7.02	0.73	0.63	1.31	71.9	52	4	13	85	42.65	3.7	4.08	4.41	3.11	4.1	2.58	2.6	2.35	90	3
14	12.27	8.45	0.77	0.74	1.52	74.47	50.1	5	14	80	43.66	4.99	5.61	5.5	3.8	5.14	2.73	3.45	2.55	85	4
15	12.95	8.9	0.78	0.79	1.62	75.57	49.4	6	15	79	46.5	4.62	5.1	5.98	4.18	5.57	2.93	3.2	2.66	86	4
16	11.56	7.7	0.74	0.69	1.47	72.27	50.95	4	13	84	44.59	4.38	4.2	5.43	4.38	4.87	2.6	2.7	2.45	90	3
17	10.9	7.37	0.73	0.64	1.34	71.6	52.47	4	13	85	43.82	3.7	4.35	4.9	3.1	4.63	2.58	2.58	2.38	92	3
18	13.1	9.05	0.79	0.77	1.54	76.32	48.76	6	16	77	47.1	4.64	5.03	5.9	4.24	5.47	2.9	3.3	2.7	84	3
19	12.2	8.3	0.76	0.7	1.49	73.43	49.77	5	14	80	45.3	4.92	5.7	5.96	3.7	4.5	2.74	2.98	2.55	85	3
20	10.35	6.95	0.73	0.65	1.42	71.4	52.07	4	12	85	42.4	3.74	4.3	4.85	3.78	4.2	2.71	2.5	2.36	92	3
21	12.59	8.68	0.78	0.75	1.52	75.29	49.13	5	15	78	46.44	4.43	4.64	4.74	4.31	5.76	2.65	3.24	2.6	85	4
22	11.35	7.62	0.74	0.68	1.45	72.25	50.55	4	13	84	44.34	3.97	4.4	5.04	3.58	4.88	2.6	2.6	2.49	90	3
23	11.28	7.4	0.74	0.69	1.33	72.01	51.4	4	13	83	44.1	3.84	4.12	5	3.61	4.73	2.65	2.67	2.4	89	3
24	12.48	8.53	0.76	0.74	1.44	73.6	49.9	5	14	80	45.46	4.1	4.6	4.38	3.7	5.16	2.7	2.94	2.54	85	3
25	13.7	9.2	0.79	0.77	1.54	76.07	48.85	6	16	78	46.7	4.77	5.24	5.84	4.33	5.42	2.8	3.37	2.7	84	4

## Sheet: Second test (DT-TUG)
Second test of dual-task timed up and go test
Subject	Time to Complete Test	Walk Time	Mean Stance Time	Mean Step Time	Mean Stride Time	Mean Stride Length	Mean Stride Velocity	Number of Gait Cycles	Number of Steps	Cadence	Double Support of Gait Cycle	Coefficient of Variability Stride Time	Coefficient of Variability Step Time	Coefficient of Variability Stride Velocity	Coefficient of Variability Stride Length	Coefficient of Variability Single Support	Turn Mid-Point Time	Turn Time	Return from Turn Time	Turning Magnitude	Number Strides In Turn
1	10.63	7.04	0.73	0.62	1.42	72.08	50.7	4	13	84	40.58	3.99	4.4	5.14	3.5	4.67	2.57	2.72	2.35	85	3
2	11.24	7.63	0.75	0.72	1.44	73.2	50.98	4	14	83	39.3	3.43	4.74	5.34	4.82	4.5	2.85	2.95	2.46	88	3
3	11.06	7.5	0.75	0.71	1.42	74.1	51.45	4	14	84	41.53	3.95	4.56	5.08	3.54	4.32	2.66	2.75	2.45	93	2
4	11.72	8.15	0.76	0.73	1.46	74.54	51	5	15	82	46.03	4.78	4.85	5.65	4.8	4.77	2.61	2.93	2.59	88	3
5	10.45	6.96	0.73	0.69	1.38	74.8	52.25	4	13	85	41.54	3.75	4.35	4.5	3.3	4.64	2.35	2.5	2.31	92	3
6	12.62	8.7	0.78	0.71	1.48	78.68	49.86	5	15	79	47.6	5.01	5.72	6.14	5.25	5.71	2.85	3.16	2.62	85	3
7	10.96	7.1	0.74	0.69	1.38	72.57	51.54	4	13	84	44.27	3.93	4.2	5.3	3.58	4.4	2.4	2.6	2.4	90	3
8	11.85	7.91	0.76	0.72	1.44	73.77	50.21	5	15	81	45.27	4.6	4.8	5.76	3.77	5.03	2.7	2.9	2.57	85	3
9	10.25	6.94	0.73	0.61	1.36	72.2	52.31	4	13	85	40.55	3.74	4.1	4.92	3.3	4.6	2.52	2.57	2.34	91	3
10	11.66	8.09	0.76	0.73	1.46	74.2	50.5	5	14	82	45.32	4.74	4.77	5.5	4.33	5.07	2.78	2.97	2.5	86	3
11	12.9	8.88	0.78	0.94	1.72	76.05	49.3	5	15	78	46.5	5.27	5.14	5.93	4.63	5.33	2.95	3.24	3.05	85	4
12	11.6	8	0.75	0.7	1.4	72.08	50.33	4	14	82	44.9	4.52	4.77	5.25	3.65	4.94	2.7	2.8	2.44	89	3
13	10.85	7.3	0.74	0.69	1.38	72.23	51.26	4	14	83	42.99	4.33	4.24	5.13	3.53	4.47	2.6	2.67	2.4	87	3
14	11.84	8.15	0.76	0.73	1.46	74.03	50.89	5	14	82	45.2	4.16	4.72	5.37	3.74	5.04	2.7	2.95	2.5	88	3
15	13.4	9.26	0.79	0.77	1.54	76.42	48.9	5	15	77	50.03	5.72	5.7	6	4.28	5.7	3.04	3.3	2.73	84	4
16	11.99	8	0.75	0.7	1.4	75.6	50.3	4	13	82	44.9	3.46	4.2	5.21	3.6	4.47	2.76	2.81	2.58	87	3
17	11.28	7.6	0.74	0.64	1.38	72.1	51.64	4	13	83	38.1	3.35	4.45	5.1	3.51	4.7	2.66	2.61	2.47	89	3
18	12.64	8.74	0.78	0.78	1.52	75.7	49.27	5	15	79	46.45	4.56	5.05	5.79	4.41	5.35	2.93	3.1	2.66	86	3
19	11.74	8.04	0.75	0.72	1.44	73.66	50.29	5	14	82	41.85	3.8	3.96	5.23	4.38	4.42	2.64	2.8	2.5	88	3
20	10.78	7.24	0.74	0.69	1.38	72.04	51.3	4	13	83	43.7	4.38	4.4	5.07	4.09	4.72	2.6	2.6	2.4	89	3
21	12.12	8.3	0.77	0.74	1.48	74.87	49.61	5	15	80	46.07	4.7	4.91	6.03	4.86	5.1	2.72	3.09	2.55	87	3
22	11.82	7.92	0.75	0.72	1.42	72.7	50.08	4	13	82	44.62	4.58	4.57	5.1	3.65	4.93	2.65	2.89	2.43	87	3
23	10.88	7.1	0.73	0.68	1.36	74.55	52.25	4	13	85	40.81	3.76	4.34	4.9	3.85	4.6	2.25	2.59	2.35	92	3
24	12.02	8.11	0.75	0.71	1.42	73.1	50.45	5	14	82	43	4.52	4.4	5.25	4.2	4.21	2.61	2.86	2.5	88	3
25	14.16	9.6	0.8	0.83	1.58	77.51	48.3	5	15	76	49.2	5.51	5.36	6.4	4.4	5.77	3.08	3.43	2.75	82	5
