# Supplementary material for: Reliability of Wearable Sensors Single and Dual-Task Timed Up and Go Test Among Community-Dwelling Older Women
Source: Research Square preprint supplement (doi:10.21203/rs.3.rs-6693525/v1), 2025-06-03
Supplement: Supplementary file 2 [file f9a2d169699da87ca190c8b3.xlsx]

## Sheet: First test (ST-TUG)
First test of Single-task timed up and go test
Subject	Time to Complete Test	Walk Time	Mean Stance Time	Mean Step Time	Mean Stride Time	Mean Stride Length	Mean Stride Velocity	Number of Gait Cycles	Number of Steps	Cadence	Double Support of Gait Cycle	Coefficient of Variability Stride Time	Coefficient of Variability Step Time	Coefficient of Variability Stride Velocity	Coefficient of Variability Stride Length	Coefficient of Variability Single Support	Turn Mid-Point Time	Turn Time	Return from Turn Time	Turning Magnitude	Number Strides In Turn
1	7.58	4.62	0.62	0.57	1.14	64.2	58.23	3	9	105	39.57	2.54	3.08	3.22	2.63	3.14	1.83	1.94	1.65	99	2
2	7.96	4.7	0.63	0.58	1.16	65.31	57.55	3	10	103	36.23	2.65	3.14	3.6	2.53	3.24	1.85	2.03	1.76	98	2
3	8.1	5.04	0.64	0.59	1.18	67.08	56.2	3	10	101	38	2.43	3.24	3.73	2.66	3.4	1.96	2	1.76	97	2
4	8.8	5.41	0.65	0.62	1.24	68.8	55.83	4	11	98	39.03	2.33	3.5	4.78	2.86	3.52	2	2.22	1.83	99	2
5	7.9	5.08	0.62	0.57	1.14	64.55	58.86	3	10	106	37.03	2.87	3.03	3.48	2.54	3.1	1.8	1.95	1.65	103	2
6	9.32	5.51	0.64	0.6	1.2	67.2	56.06	4	11	99	38.26	2.9	3.38	3.84	2.74	3.33	2.04	2.12	1.84	96	2
7	8.77	5.25	0.64	0.6	1.2	69.03	57	3	10	100	39.5	3.13	3.43	3.85	2.7	3.4	1.95	2.13	1.77	94	2
8	9.86	6.04	0.65	0.63	1.26	70.13	55.38	4	12	95	40.24	3.3	3.74	4.22	3.03	3.61	2.14	2.38	1.85	90	3
9	8.39	5.28	0.63	0.59	1.18	66.28	57.52	3	10	103	37.08	2.77	3.15	4.52	2.53	3.29	1.84	2.07	1.79	99	2
10	8.66	5.21	0.64	0.6	1.2	66.5	56.03	3	10	99	38.28	3.17	3.3	4.75	2.78	3.39	1.9	2.17	1.72	96	2
11	9.82	6.04	0.66	0.63	1.26	69.29	55.2	4	11	95	40	3.24	3.73	5.15	3.03	3.6	2.05	2.3	1.85	92	2
12	7.62	4.54	0.61	0.56	1.12	65.88	59.22	3	9	108	36.58	2.59	3.02	4.43	2.41	3.16	1.79	1.87	1.6	91	2
13	8.84	5.42	0.65	0.62	1.24	68.69	56.53	3	10	100	39.22	2.84	3.53	4.07	2.8	3.55	1.97	2.25	1.8	94	2
14	8.1	5.05	0.64	0.59	1.18	67.5	57.2	3	9	102	37.85	2.72	3.28	3.65	2.62	3.2	1.87	2.04	1.71	99	2
15	9.58	5.91	0.66	0.63	1.26	69.8	55.02	4	11	96	40.05	3.4	3.78	4.1	3	3.66	2.07	2.35	1.85	92	3
16	8.45	5.27	0.64	0.6	1.2	66.21	56.22	3	10	101	38.2	2.97	3.34	3.85	2.7	3.3	1.9	2.1	1.75	102	2
17	7.8	4.58	0.61	0.57	1.14	66	58.58	3	10	106	37.03	2.58	3.08	3.42	2.54	3.1	1.8	1.94	1.67	101	2
18	10	6.74	0.67	0.63	1.26	69.56	54.5	4	12	94	40.23	3.23	3.92	4.31	3.15	3.7	2.05	2.47	1.94	90	3
19	8.66	5.15	0.64	0.6	1.2	67.35	56.49	3	10	99	38.26	2.88	3.3	3.8	2.69	3.36	1.99	2.17	1.77	95	2
20	9.45	5.55	0.65	0.61	1.22	68.2	55.25	3	11	97	39.09	2.68	3.6	4.73	2.8	3.63	2	2.2	1.8	97	2
21	7.7	4.55	0.61	0.57	1.14	66.16	59.04	3	9	107	36.5	2.4	3.1	3.57	2.41	3.14	1.72	1.86	1.62	101	2
22	9.98	6.45	0.66	0.63	1.26	70.1	55	4	11	94	40.21	3.47	3.82	4.37	3.1	3.7	2.15	2.36	1.81	88	3
23	8.2	4.85	0.62	0.57	1.14	66.62	58.36	3	10	104	37.01	2.68	3.12	5.53	2.52	3.12	1.8	1.93	1.65	99	2
24	9.12	5.45	0.65	0.61	1.22	68.54	55.54	4	11	98	38.5	3.15	3.44	4.06	2.74	3.4	2.01	2.23	1.79	93	2
25	8.64	5.14	0.64	0.6	1.2	68.27	56.06	3	10	101	38.84	2.9	3.32	3.84	2.73	3.31	1.95	2.12	1.75	95	2

## Sheet: Second test (ST-TUG)
Second test of Single-task timed up and go test
Subject	Time to Complete Test	Walk Time	Mean Stance Time	Mean Step Time	Mean Stride Time	Mean Stride Length	Mean Stride Velocity	Number of Gait Cycles	Number of Steps	Cadence	Double Support of Gait Cycle	Coefficient of Variability Stride Time	Coefficient of Variability Step Time	Coefficient of Variability Stride Velocity	Coefficient of Variability Stride Length	Coefficient of Variability Single Support	Turn Mid-Point Time	Turn Time	Return from Turn Time	Turning Magnitude	Number Strides In Turn
1	7.91	4.81	0.61	0.56	1.12	66.55	59.04	3	10	107	37.04	2.65	2.85	3.7	2.63	3.28	1.83	2.04	1.74	100	2
2	8.25	5.05	0.62	0.59	1.18	66.57	56.8	3	10	101	37.56	2.41	3.27	3.62	2.55	3.04	1.93	2.11	1.75	91	2
3	7.85	4.77	0.63	0.58	1.16	67.59	57.07	3	10	103	37.57	2.67	2.5	3.58	2.52	2.74	1.95	2.07	1.8	108	2
4	9.21	5.52	0.66	0.67	1.26	70.1	55.2	4	11	96	39.55	3.27	3.19	4.18	2.82	3.67	2.22	2.37	1.82	98	3
5	7.65	4.83	0.61	0.58	1.12	66.84	59.25	3	9	108	36.55	2.74	2.9	3.37	2.54	2.91	1.65	2.04	1.62	112	2
6	9.1	5.64	0.63	0.59	1.18	67.54	56.45	4	11	101	37.84	2.37	3.49	3.78	2.6	4.21	1.96	2.27	1.72	88	2
7	9.24	5.79	0.65	0.61	1.22	69.4	56.87	3	10	98	39.8	2.5	2.98	4.01	2.86	3.5	2.07	2.2	1.86	92	2
8	10.26	6.27	0.66	0.64	1.28	70.5	54.12	4	12	93	40.5	3.05	3.45	4.3	3.16	3.75	2.05	2.4	1.97	94	3
9	8.05	4.84	0.62	0.58	1.16	67.81	58.16	3	10	105	36.71	2.66	3.77	3.44	2.53	3.11	1.84	2.83	1.67	101	2
10	9.08	5.53	0.65	0.61	1.22	68.38	55.5	3	10	97	38.71	2.74	2.87	3.74	2.88	3.4	1.94	2.27	1.89	94	2
11	10.15	6.24	0.67	0.64	1.28	69.57	54.92	4	11	93	40.52	3.08	3.52	4.24	4.15	4.78	1.8	2.46	1.9	85	3
12	7.44	4.4	0.6	0.53	1.1	66.28	59.57	3	9	110	36.2	2.4	2.94	3.38	3.45	3.09	1.64	1.9	1.65	103	2
13	9.18	5.8	0.66	0.63	1.26	69.07	56.08	3	10	98	39.64	3.2	3.68	4.18	3.97	3.64	2	2.3	1.88	92	2
14	8.56	5.14	0.65	0.61	1.22	68	56.4	3	10	100	37.44	2.44	2.7	3.7	3.04	3.3	1.9	2.12	1.75	97	2
15	9.94	5.95	0.67	0.64	1.28	70.22	54.57	4	11	94	40.3	3.26	3.72	4.23	3.81	3.75	1.85	2.42	1.9	94	3
16	8.89	5.41	0.65	0.61	1.22	67.81	55.87	3	10	99	38.61	2.97	3.41	3.95	2.81	2.45	1.91	2.24	1.8	113	2
17	7.54	4.51	0.6	0.56	1.12	66.33	59.02	3	10	108	36.81	2.37	2.9	3.33	2.4	3.07	1.83	1.82	1.62	103	2
18	10.42	6.45	0.68	0.68	1.28	69.88	54.01	5	12	92	37.68	3.24	2.8	4.43	3.2	3.86	2.04	2.58	1.91	97	2
19	9.07	5.69	0.65	0.61	1.22	67.66	56.06	3	10	97	38.87	2.47	2.84	3.7	2.6	3.22	1.95	2.2	1.81	93	2
20	9.88	5.97	0.66	0.62	1.24	68.67	55.04	4	11	95	39.57	2.5	3.14	4.34	2.99	3.51	2.05	2.37	1.85	92	2
21	7.44	4.57	0.6	0.56	1.12	66.1	59.31	3	9	109	36.26	2.75	2.91	4.38	2.48	3	1.8	1.97	1.58	104	2
22	10.42	6.37	0.67	0.64	1.28	70.2	54.71	5	11	92	40.65	3.25	3.87	4.49	3.27	3.8	2.15	2.58	1.85	98	3
23	8.02	4.75	0.61	0.56	1.12	66.91	58.85	3	10	106	36.67	2.3	3	4.4	2.58	3.1	1.88	2	1.63	101	2
24	9.55	5.72	0.66	0.64	1.24	70.41	55.04	4	11	96	39.1	2.6	3.33	3.84	2.77	3.33	2.07	2.3	1.83	94	2
25	9.05	5.35	0.65	0.61	1.22	68.65	55.4	3	10	99	38.47	2.51	3.15	3.97	2.8	3.4	1.98	2.24	1.82	93	2
